# Supplementary material for: A Miniaturized QuEChERS Method Combined with Ultrahigh Liquid Chromatography Coupled to Tandem Mass Spectrometry for the Analysis of Pyrrolizidine Alkaloids in Oregano Samples
Source: MDPI journal article supplement (doi:10.3390/foods9091319), 2020-09-18
Supplement: s1 [file s1]

## **Supplementary material**

**Table S1.** Oregano food alerts reported on the Food and Feed Safety Alerts (RASFF) portal related to the presence of pyrrolizidine alkaloids (PAs) and their oxidized forms (pyrrolizidine alkaloids *N*-oxides, PANOS) during 2019-2020. Data obtained online from: <https://webgate.ec.europa.eu/rasff-window/portal/?event=SearchForm&cleanSearch=1> (accessed on 28 May 2020)

**Search criteria** | **Hazard category** natural toxins (other) | **Risk decision** serious

| product category | date       | reference | product type | notification type         | notification basis             | notified by | countries concerned                                                                                                                                                      | subject                                                                                                     | action taken                 | distribution status                          | risk decision |
|------------------|------------|-----------|--------------|---------------------------|--------------------------------|-------------|--------------------------------------------------------------------------------------------------------------------------------------------------------------------------|-------------------------------------------------------------------------------------------------------------|------------------------------|----------------------------------------------|---------------|
| herbs and spices | 28/01/2019 | 2019.0305 | food         | alert                     | company's own check            | Germany     | Austria (O), Belgium (D), Czech Republic (D), France (D), Germany (D/O), INFOSAN, Netherlands (D), Slovakia (D), Turkey (O), Ukraine (D)                                 | pyrrolizidine alkaloids (35447; 42724 µg/kg - ppb) in oregano from Austria and Turkey, processed in Germany | withdrawal from the market   | distribution to other member countries       | serious       |
| herbs and spices | 12/02/2019 | 2019.0504 | food         | alert                     | official control on the market | Germany     | Austria (D), Commission Services, France (D), Germany (D), INFOSAN, Italy (D), Turkey (O)                                                                                | pyrrolizidine alkaloids (6660 µg/kg - ppb) in oregano from Turkey                                           | withdrawal from the market   | distribution to other member countries       | serious       |
| herbs and spices | 25/03/2019 | 2019.1121 | food         | information for attention | company's own check            | Germany     | Germany (D), INFOSAN, Turkey (O)                                                                                                                                         | pyrrolizidine alkaloids (16896 µg/kg - ppb) in dried oregano from Turkey                                    | detained by operator         | distribution restricted to notifying country | serious       |
| herbs and spices | 09/05/2019 | 2019.1736 | food         | alert                     | official control on the market | Austria     | Austria (D), France (O), Germany (D)                                                                                                                                     | pyrrolizidine alkaloids (14871 µg/kg - ppb) in oregano from France                                          | withdrawal from the market   | distribution to other member countries       | serious       |
| herbs and spices | 09/05/2019 | 2019.1739 | food         | alert                     | official control on the market | Austria     | Austria (D/O), Germany (D)                                                                                                                                               | pyrrolizidine alkaloids (14366 µg/kg - ppb) in oregano from Austria                                         | detained by operator         | distribution to other member countries       | serious       |
| herbs and spices | 09/05/2019 | 2019.1741 | food         | alert                     | official control on the market | Austria     | Austria (D/O), Germany (D)                                                                                                                                               | pyrrolizidine alkaloids (21011 µg/kg - ppb) in rubbed oregano from Austria                                  | detained by operator         | distribution to other member countries       | serious       |
| herbs and spices | 31/05/2019 | 2019.1997 | food         | information for attention | official control on the market | Germany     | Germany (D), INFOSAN, Turkey (O)                                                                                                                                         | pyrrolizidine alkaloids (9870 µg/kg - ppb) in oregano from Turkey                                           | withdrawal from the market   | distribution restricted to notifying country | serious       |
| herbs and spices | 03/06/2019 | 2019.2012 | food         | information for attention | official control on the market | Germany     | Germany (D), INFOSAN, Turkey (O)                                                                                                                                         | pyrrolizidine alkaloids (13100 µg/kg - ppb) in rubbed oregano from Turkey                                   | withdrawal from the market   | distribution restricted to notifying country | serious       |
| herbs and spices | 07/06/2019 | 2019.2099 | food         | alert                     | official control on the market | Germany     | Austria (O), France (D), Germany (D), Italy (D)                                                                                                                          | pyrrolizidine alkaloids (11600 µg/kg - ppb) in oregano from Austria                                         | withdrawal from recipient(s) | distribution to other member countries       | serious       |
| herbs and spices | 20/06/2019 | 2019.2235 | food         | alert                     | official control on the market | Germany     | Austria (D), Belgium (D), Cyprus, France (D), Germany (D), INFOSAN, Netherlands (D), Turkey (O)                                                                          | pyrrolizidine alkaloids (11700 µg/kg - ppb) in oregano from Turkey                                          | withdrawal from recipient(s) | distribution to other member countries       | serious       |
| herbs and spices | 08/07/2019 | 2019.2458 | food         | information for attention | official control on the market | Germany     | Germany (D), INFOSAN, Turkey (O)                                                                                                                                         | pyrrolizidine alkaloids (10526 µg/kg - ppb) in oregano from Turkey                                          | detained by operator         | distribution restricted to notifying country | serious       |
| herbs and spices | 10/07/2019 | 2019.2504 | food         | alert                     | official control on the market | Austria     | Austria (D), Germany (D), INFOSAN, Turkey (O)                                                                                                                            | pyrrolizidine alkaloids (15852 µg/kg - ppb) in oregano from Turkey                                          | withdrawal from the market   | distribution to other member countries       | serious       |
| herbs and spices | 19/07/2019 | 2019.2635 | food         | information for attention | official control on the market | Germany     | Germany (D), INFOSAN, Turkey (O)                                                                                                                                         | pyrrolizidine alkaloids (13641 µg/kg - ppb) in oregano from Turkey                                          | recall from consumers        | distribution restricted to notifying country | serious       |
| herbs and spices | 30/07/2019 | 2019.2763 | food         | alert                     | official control on the market | Germany     | Belgium (D), France (D), Germany (D), INFOSAN, Malta (D), Netherlands (D), Turkey (O), unknown origin                                                                    | pyrrolizidine alkaloids (18496 µg/kg - ppb) in oregano from Turkey                                          | recall from consumers        | distribution to other member countries       | serious       |
| herbs and spices | 07/08/2019 | 2019.2881 | food         | information for attention | official control on the market | Germany     | Germany, INFOSAN, Turkey (O)                                                                                                                                             | pyrrolizidine alkaloids (7590 µg/kg - ppb) in oregano from Turkey                                           | return to consignor          | product not (yet) placed on the market       | serious       |
| herbs and spices | 26/09/2019 | 2019.3393 | food         | alert                     | company's own check            | Germany     | Austria (D), Belgium (D), Commission Services, Denmark (D), Germany, INFOSAN, Netherlands (D), Norway (D), Sweden (D), Turkey (O)                                        | pyrrolizidine alkaloids (22167.4 µg/kg - ppb) in oregano from Turkey                                        | informing recipient(s)       | distribution to other member countries       | serious       |
| herbs and spices | 29/01/2020 | 2020.0453 | food         | alert                     | official control on the market | Germany     | Belgium (D), Denmark (D), France (D), Germany (D/O), Hungary (D), Luxembourg (D), Netherlands (D), Poland (D), Portugal (D), Slovenia (D), Spain (D), United Kingdom (D) | pyrrolizidine alkaloids (133870 µg/kg - ppb) in rubbed oregano from Germany                                 | no stock left                | distribution to other member countries       | serious       |
| herbs and spices | 04/02/2020 | 2020.0568 | food         | alert                     | company's own check            | Germany     | Austria (D), Germany (D), INFOSAN, Turkey (O)                                                                                                                            | pyrrolizidine alkaloids (8836 µg/kg - ppb) in rubbed oregano from Turkey                                    | withdrawal from the market   | distribution to other member countries       | serious       |
| herbs and spices | 05/02/2020 | 2020.0581 | food         | alert                     | official control on the market | Germany     | France (D), Germany (D), INFOSAN, Turkey (O)                                                                                                                             | pyrrolizidine alkaloids (16962 µg/kg - ppb) in oregano from Turkey                                          | withdrawal from the market   | distribution to other member countries       | serious       |

**Table S2.** Information of the oregano samples analyzed.

| Oregano Sample | Product origin | Raw material origin | Description                              |
|----------------|----------------|---------------------|------------------------------------------|
| C-S1           | Spain          | Unknown             | Milled oregano leaf                      |
| C-S2           | Italy          | Unknown             | Lyophilized oregano                      |
| C-S3           | Spain          | Spain               | Milled oregano leaf                      |
| C-S4           | Spain          | Peru                | Milled oregano leaf                      |
| C-S5           | Spain          | Peru                | Milled oregano leaf                      |
| C-S6           | Spain          | Unknown             | Milled oregano leaf                      |
| C-S7           | Spain          | Unknown             | Milled oregano leaf                      |
| C-S8           | Spain          | Spain               | Milled oregano leaf                      |
| C-S9           | Spain          | Spain               | Milled oregano leaf                      |
| C-S10          | Spain          | Unknown             | Milled oregano leaf                      |
| C-S11          | Spain          | Unknown             | Milled oregano leaf                      |
| C-S12          | Spain          | Unknown             | Milled oregano leaf                      |
| C-S13          | France         | Turkey              | Milled oregano leaf                      |
| C-S14-A        | Spain          | France              | Milled oregano leaf                      |
| C-S14-B        | Spain          | France              | Milled oregano leaf                      |
| C-S15-A        | Germany        | Turkey              | Milled oregano leaf                      |
| C-S15-B        | Germany        | Turkey              | Milled oregano leaf                      |
| C-S16-A        | Spain          | Spain               | Milled oregano leaf                      |
| C-S16-B        | Spain          | Spain               | Milled oregano leaf                      |
| O-S17          | Spain          | Unknown             | Milled oregano leaf from organic farming |
| O-S18          | Spain          | Spain               | Milled oregano leaf from organic farming |
| O-S19          | Spain          | Unknown             | Milled oregano leaf from organic farming |
| W-S20          | Spain          | Spain               | Wild oregano on branch                   |

**Table S3.** Solvent-based standard and matrix-matched calibration curves (expressed at µg/L)

| Analyte                        | Solvent-based standard calibration,<br>R <sup>2</sup> | Matrix-matched calibration,<br>R <sup>2</sup> |
|--------------------------------|-------------------------------------------------------|-----------------------------------------------|
| Intermedine                    | y = 27944 x – 53949<br>0.999                          | y = 6513 x + 5771<br>0.999                    |
| Europine                       | y = 61607 x – 49511<br>0.999                          | y = 14342 x + 58782<br>0.999                  |
| Lycopsamine                    | y = 27348 x - 25302<br>0.999                          | y = 4990 x + 8916<br>0.999                    |
| Europine <i>N</i> -oxide       | y = 138491 x – 357700<br>0.998                        | y = 21811 x + 43628<br>0.999                  |
| Intermedine <i>N</i> -oxide    | y = 40240 x + 144383<br>0.999                         | y = 6754 x + 75308<br>0.999                   |
| Lycopsamine <i>N</i> -oxide    | y = 48020 x – 282150<br>0.999                         | y = 6454x + 29990<br>0.999                    |
| Retrorsine                     | y = 26655 x + 2816<br>0.999                           | y = 3493 x + 12358<br>0.999                   |
| Retrorsine <i>N</i> -oxide     | y = 9764 x + 40585<br>0.999                           | y = 1739 x + 13424<br>0.999                   |
| Seneciphylline                 | y = 61799 x – 12213<br>0.998                          | y = 7181 x + 25457<br>0.999                   |
| Heliotrine                     | y = 88524 x + 33860<br>0.998                          | y = 15268 x + 9413<br>0.999                   |
| Seneciphylline <i>N</i> -oxide | y = 27270 x + 27109<br>0.998                          | y = 9139 x - 29835<br>0.999                   |
| Heliotrine <i>N</i> -oxide     | y = 68052 x – 183194<br>0.999                         | y = 2189 x + 13923<br>0.999                   |
| Senecivernine                  | y = 100194 x – 46983<br>0.998                         | y = 24972 x + 480780<br>0.999                 |
| Senecionine                    | y = 143096 x + 2237<br>0.998                          | y = 25056 x + 339046<br>0.999                 |
| Senecivernine <i>N</i> -oxide  | y = 18958 x + 42888<br>0.999                          | y = 7319 x + 4421<br>0.999                    |
| Senecionine <i>N</i> -oxide    | y = 13974 x + 34238<br>0.999                          | y = 3865 x + 146398<br>0.999                  |
| Echimidine                     | y = 88932 x – 223173<br>0.998                         | y = 15054 x + 167863<br>0.999                 |
| Echimidine <i>N</i> -oxide     | y = 2911 x + 64931<br>0.999                           | y = 3217 x - 48988<br>0.999                   |
| Senkirkin                      | y = 54118 x + 412125<br>0.998                         | y = 4247 x + 17984<br>0.999                   |
| Lasiocarpine                   | y = 5028 x – 24107<br>0.998                           | y = 902 x - 4928<br>0.999                     |
| Lasiocarpine <i>N</i> -oxide   | y = 150969 x + 113710<br>0.999                        | y = 20006 x + 2254<br>0.999                   |

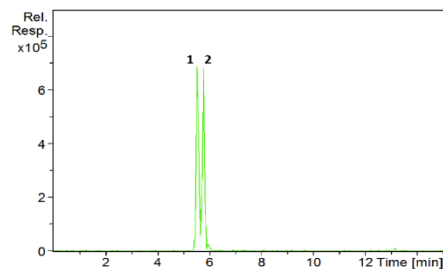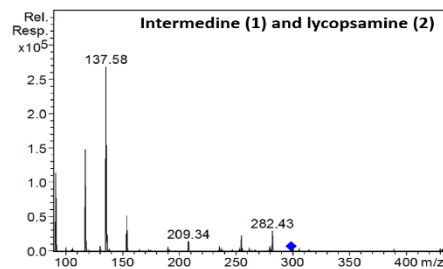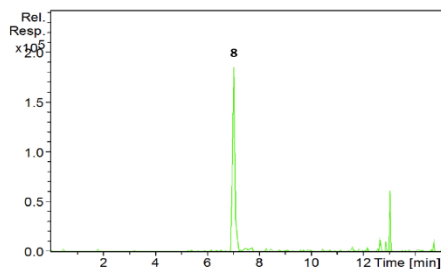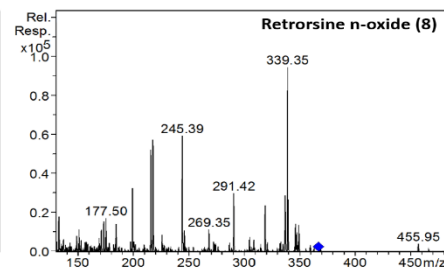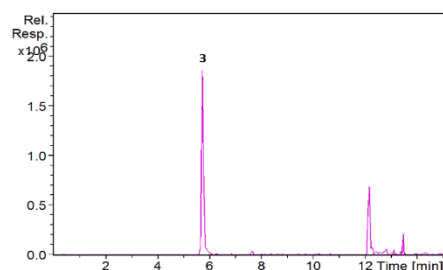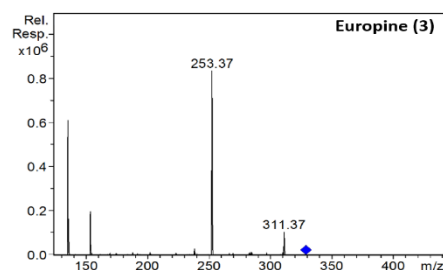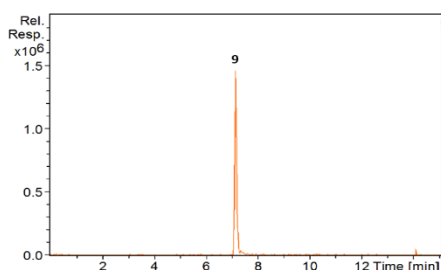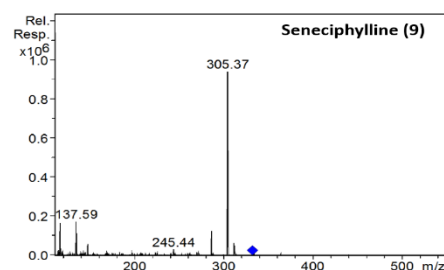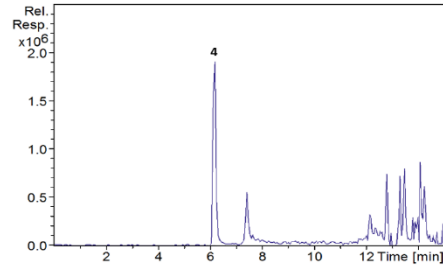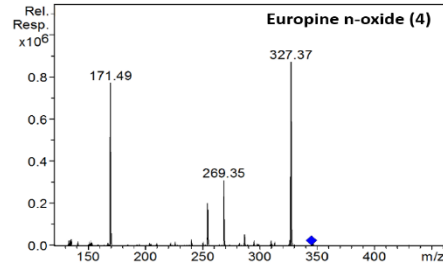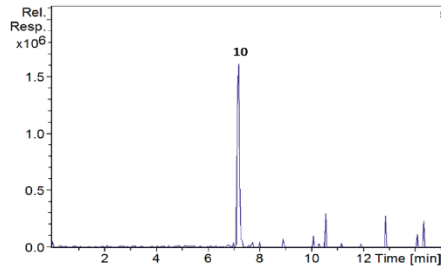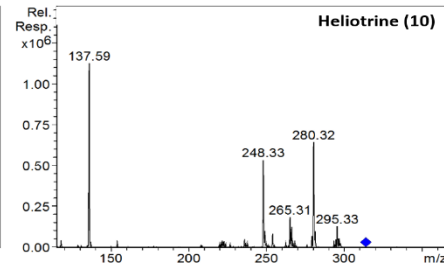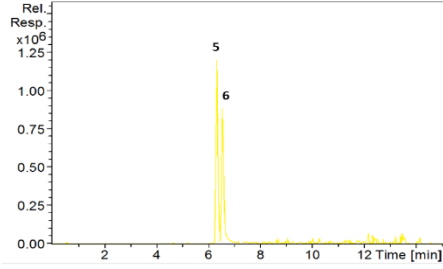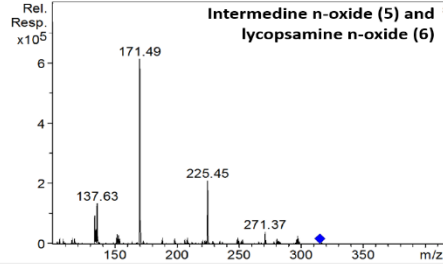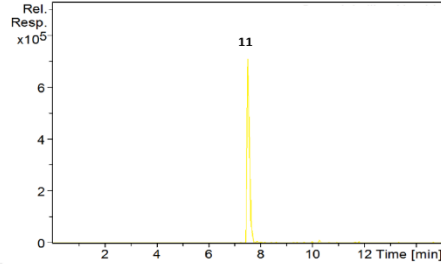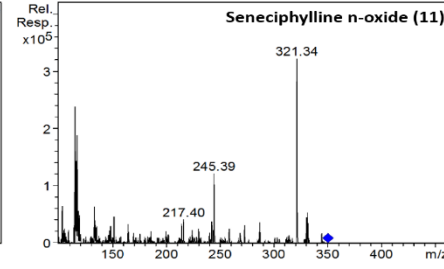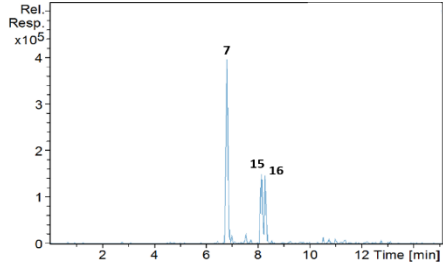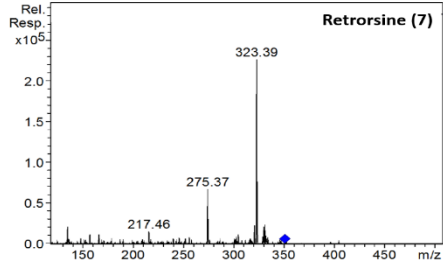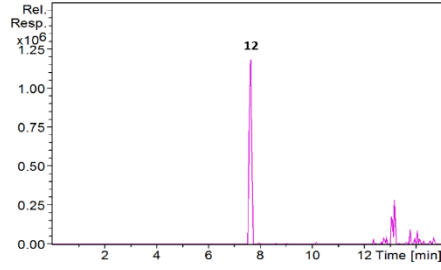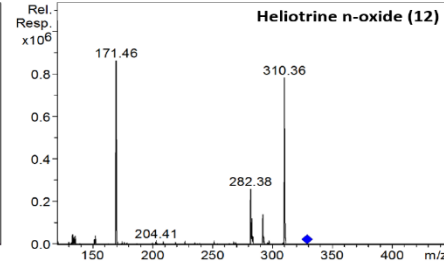

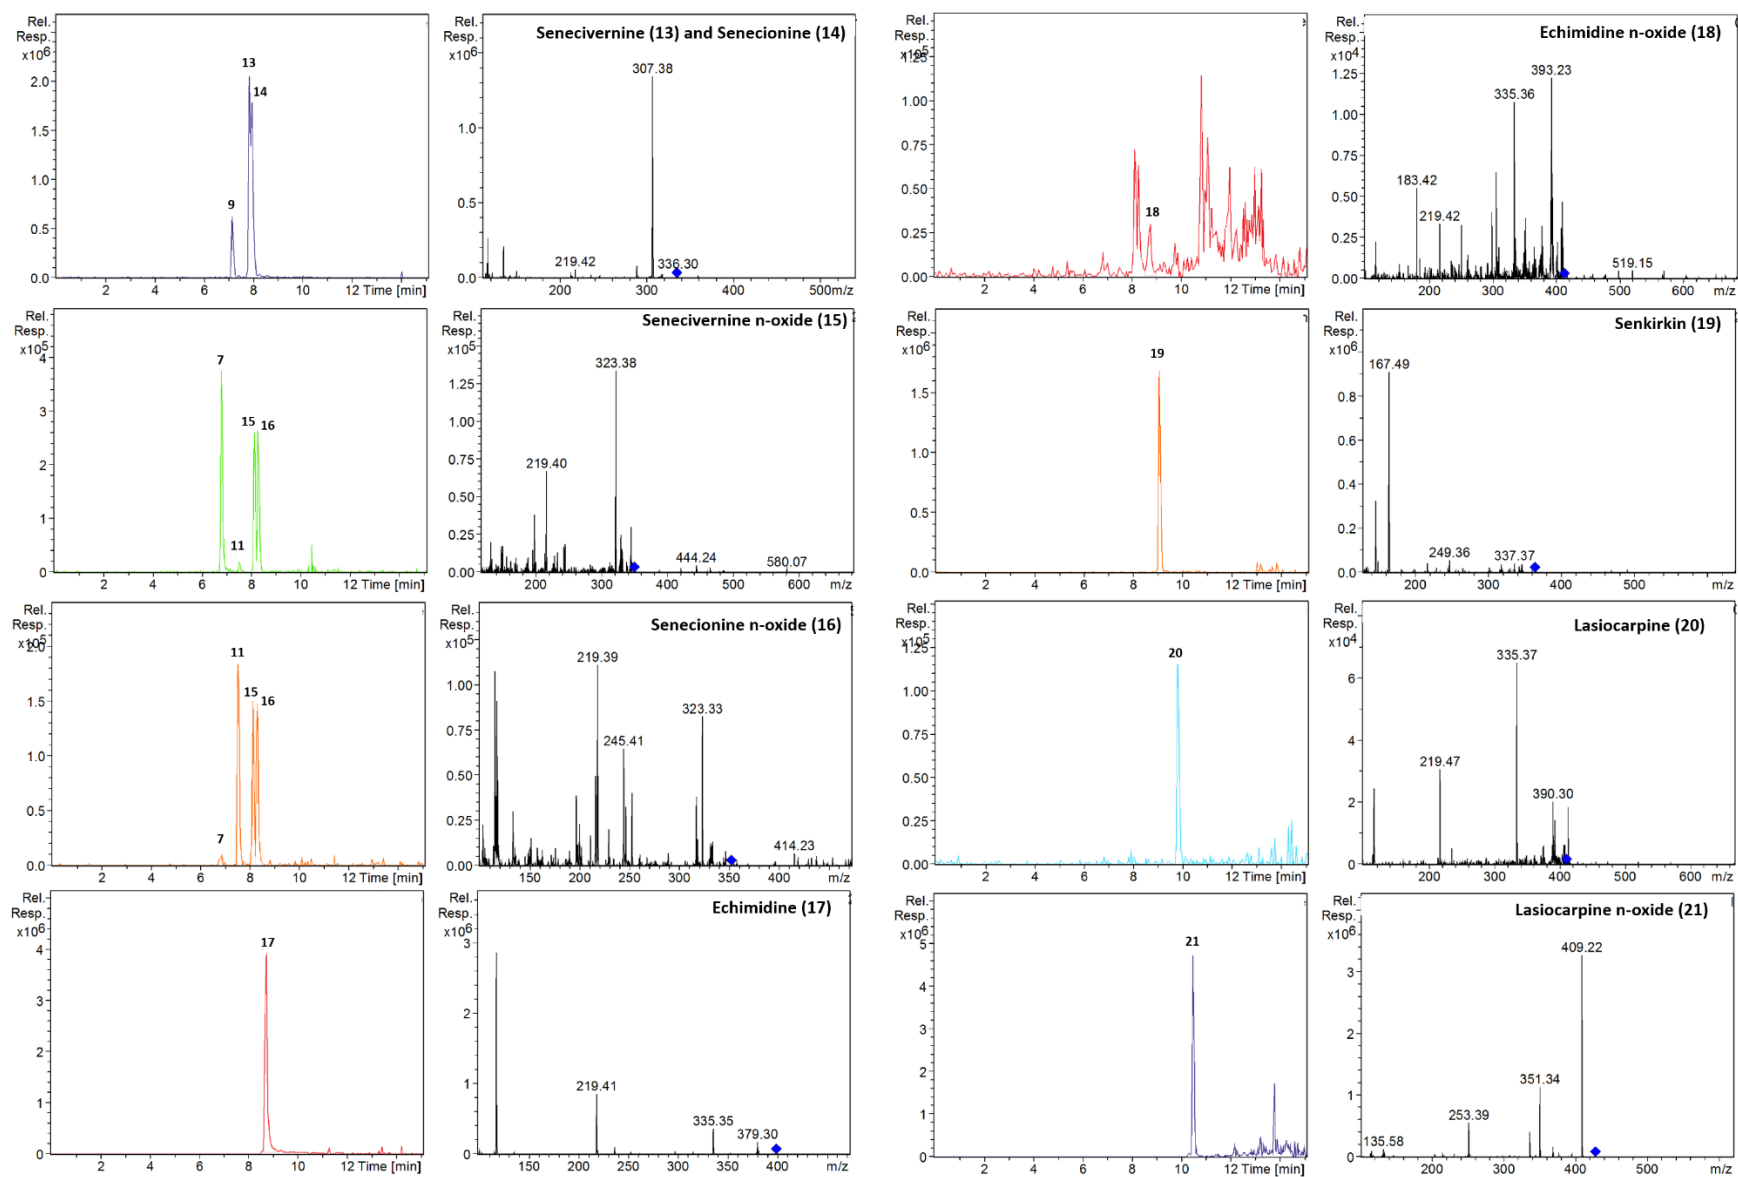

**Figure S1.** Extracted ion chromatograms and mass spectra (MS<sup>2</sup>) of: intermedine (1), lycopsamine (2), europine (3), europine *N*-oxide (4) intermedine *N*-oxide (5), lycopsamine *N*-oxide (6), retrorsine (7), retrorsine *N*-oxide (8), seneciphylline (9), heliotrine (10), seneciphylline *N*-oxide (11), heliotrine *N*-oxide (12), senecivernine (13), senecionine (14), senecivernine *N*-oxide (15), senecionine *N*-oxide (16), echimidine (17), echimidine *N*-oxide (18), senkirkin (19), lasiocarpine (20) and lasiocarpine *N*-oxide (21) in a standard solution containing 100 µg/L of each analyte.
